# Supplementary material
Source: HighWire-hosted journal article supplement (http://canjsurg.ca/highwire/filestream/98368/field_highwire_adjunct_files/1/CJS-019721-at-2.pdf)

DOI: 10.1503/cjs.019721

Online appendices are unedited and posted as supplied by the authors.

## Appendix 2: Risk differences (RD) Forest plots for significant outcomes

### A. Total SSI

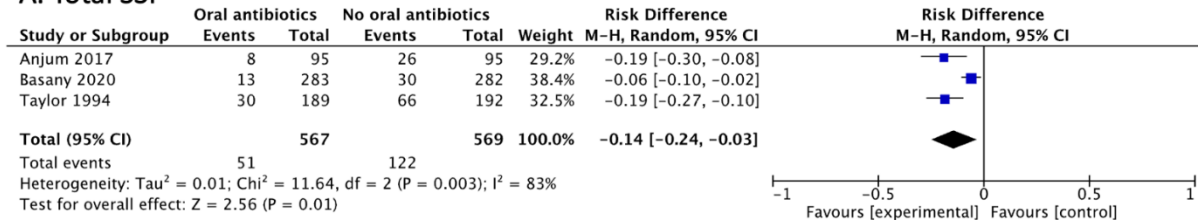

### B. Superficial SSI

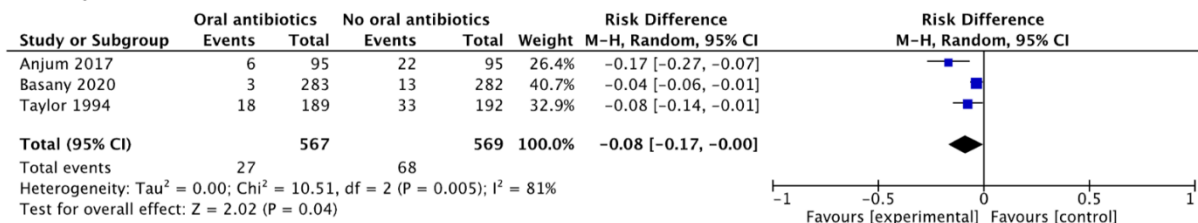

### C. Deep SSI

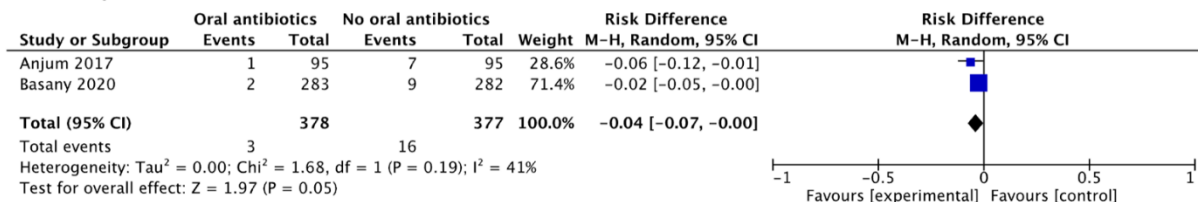

### D. Anastomotic leaks

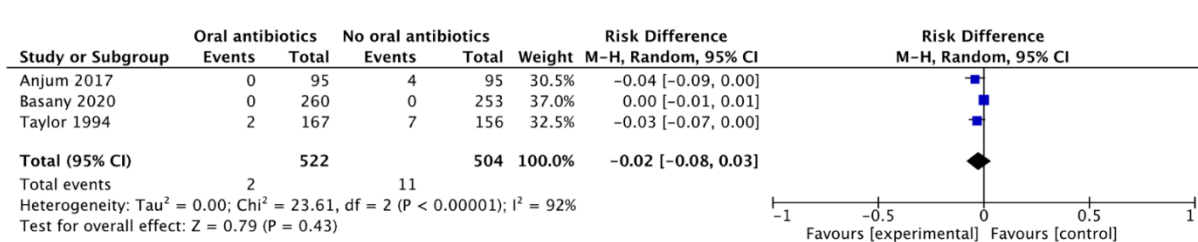

Supplement: CJS-019721-at-2.pdf [file CJS-019721-at-2.pdf]
